# Supplementary material
Source: PubMed Central journal article supplement (PMC4292488)
Supplement: AEM.03366-14_zam999105958so1.pdf [file AEM.03366-14_zam999105958so1.pdf]

## PIG FARM QUESTIONNAIRE – Baseline study - Dong Thap

Date of interview: ...../...../.....

Farm ID: .....

Interviewer: .....

Verified by: .....

### General information

|          |                                                                       |                            |                      |
|----------|-----------------------------------------------------------------------|----------------------------|----------------------|
| <b>1</b> | <i>Name of interviewee</i> (Print in block letters)<br>.....          | <i>Telephone:</i><br>..... |                      |
| <b>2</b> | Gender: <input type="checkbox"/> Male <input type="checkbox"/> Female | Age (in years): .....      |                      |
| <b>3</b> | <i>Address of farm</i>                                                |                            |                      |
| <b>4</b> | <i>Village</i> (Print in block letters)                               |                            |                      |
| <b>5</b> | <i>Commune</i> (Print in block letters)                               |                            |                      |
| <b>6</b> | <i>District</i> (Print in block letters)                              |                            |                      |
| <b>7</b> | <i>Province</i> (Print in block letters)                              |                            |                      |
| <b>8</b> | Indicate total surface dedicated to pig housing (sq. m)               |                            |                      |
| <b>9</b> | Coordinates (GPS) (if known)                                          |                            | Degrees <sup>o</sup> |
|          |                                                                       |                            | Minutes'             |
|          | Northing                                                              | ---                        | --·----              |
|          | Easting                                                               | ---                        | --·----              |

## Pigs

| <b>10</b>                | <i>Please describe in the table below all groups of pigs currently kept in your farm</i> |                                                   |                                                 |                          |
|--------------------------|------------------------------------------------------------------------------------------|---------------------------------------------------|-------------------------------------------------|--------------------------|
| Pig type                 | Number                                                                                   | Age (in month/s)<br>[Indicate range if multi-age] | Are pigs kept in their pen/house 24h/day? (Y/N) |                          |
|                          |                                                                                          |                                                   | Yes                                             | No                       |
| Sow/s                    |                                                                                          |                                                   | <input type="checkbox"/>                        | <input type="checkbox"/> |
| Suckler/s                |                                                                                          |                                                   | <input type="checkbox"/>                        | <input type="checkbox"/> |
| Gilt/s                   |                                                                                          |                                                   | <input type="checkbox"/>                        | <input type="checkbox"/> |
| Weaner/Grower/Fattener/s |                                                                                          |                                                   | <input type="checkbox"/>                        | <input type="checkbox"/> |
| Boar/s                   |                                                                                          |                                                   | <input type="checkbox"/>                        | <input type="checkbox"/> |
| Total                    |                                                                                          |                                                   | <input type="checkbox"/>                        | <input type="checkbox"/> |

## Animal/s other than pigs

|                                                                                                                                                                                                                   |                                                                                                                                                                                                                                                                                                                                                                                                                                                                                                                                                                                                                              |  |
|-------------------------------------------------------------------------------------------------------------------------------------------------------------------------------------------------------------------|------------------------------------------------------------------------------------------------------------------------------------------------------------------------------------------------------------------------------------------------------------------------------------------------------------------------------------------------------------------------------------------------------------------------------------------------------------------------------------------------------------------------------------------------------------------------------------------------------------------------------|--|
| <b>11</b>                                                                                                                                                                                                         | <i>Indicate any animal species other than swine present in your farm, and the total number of animals of each species.</i>                                                                                                                                                                                                                                                                                                                                                                                                                                                                                                   |  |
| <input type="checkbox"/> Cattle; No.:..... <input type="checkbox"/> Buffalo; No.:..... <input type="checkbox"/> Dog; No.:..... <input type="checkbox"/> Cat; No.:..... <input type="checkbox"/> Rabbit; No.:..... |                                                                                                                                                                                                                                                                                                                                                                                                                                                                                                                                                                                                                              |  |
| <input type="checkbox"/> Poultry                                                                                                                                                                                  | <input type="checkbox"/> Meat chicken; No.:.....<br><input type="checkbox"/> Layer chicken; No.:.....<br><input type="checkbox"/> Mixed (double purpose) chicken; No.:.....<br><input type="checkbox"/> Meat duck; No.:.....<br><input type="checkbox"/> Layer duck; No.:.....<br><input type="checkbox"/> Mixed purpose duck; No.:.....<br><input type="checkbox"/> Breeding duck flock; No.:.....<br><input type="checkbox"/> Muscovy duck; No.:.....<br><input type="checkbox"/> Quail; No.:.....<br><input type="checkbox"/> Fighting cockerel; No.:.....<br><input type="checkbox"/> Other poultry (specify): No.:..... |  |

## Health status of the herd

| <b>12</b>                | <i>Describe the main health problems observed in your pigs over the last 6 months, as well as now (you may tick several boxes if required). If no disease has been observed, tick this box <input type="checkbox"/></i> |                          |                          |                                             |                              |                          |                          |                          |                                                      |                          |       |
|--------------------------|-------------------------------------------------------------------------------------------------------------------------------------------------------------------------------------------------------------------------|--------------------------|--------------------------|---------------------------------------------|------------------------------|--------------------------|--------------------------|--------------------------|------------------------------------------------------|--------------------------|-------|
| Pig type                 | Sick or died over last 6 months                                                                                                                                                                                         | Signs of disease now     | Describe health problems |                                             |                              |                          |                          |                          |                                                      |                          |       |
|                          |                                                                                                                                                                                                                         |                          | Respiratory              | Gastroenteric<br>(ie. vomiting, vdiarrhoea) | CNS<br>(incoordination, etc) | Inappetence/ malaise     | Lameness                 | Sudden death             | Poor reproductive<br>performance<br>(incl. Abortion) | Other signs (specify)    |       |
| Sow/s                    | <input type="checkbox"/>                                                                                                                                                                                                | <input type="checkbox"/> | <input type="checkbox"/> | <input type="checkbox"/>                    | <input type="checkbox"/>     | <input type="checkbox"/> | <input type="checkbox"/> | <input type="checkbox"/> | <input type="checkbox"/>                             | <input type="checkbox"/> | ..... |
| Suckler/s                | <input type="checkbox"/>                                                                                                                                                                                                | <input type="checkbox"/> | <input type="checkbox"/> | <input type="checkbox"/>                    | <input type="checkbox"/>     | <input type="checkbox"/> | <input type="checkbox"/> | <input type="checkbox"/> | <input type="checkbox"/>                             | <input type="checkbox"/> | ..... |
| Guilt/s                  | <input type="checkbox"/>                                                                                                                                                                                                | <input type="checkbox"/> | <input type="checkbox"/> | <input type="checkbox"/>                    | <input type="checkbox"/>     | <input type="checkbox"/> | <input type="checkbox"/> | <input type="checkbox"/> | <input type="checkbox"/>                             | <input type="checkbox"/> | ..... |
| Weaner/Grower/Fattener/s | <input type="checkbox"/>                                                                                                                                                                                                | <input type="checkbox"/> | <input type="checkbox"/> | <input type="checkbox"/>                    | <input type="checkbox"/>     | <input type="checkbox"/> | <input type="checkbox"/> | <input type="checkbox"/> | <input type="checkbox"/>                             | <input type="checkbox"/> | ..... |
| Boar/s                   | <input type="checkbox"/>                                                                                                                                                                                                | <input type="checkbox"/> | <input type="checkbox"/> | <input type="checkbox"/>                    | <input type="checkbox"/>     | <input type="checkbox"/> | <input type="checkbox"/> | <input type="checkbox"/> | <input type="checkbox"/>                             | <input type="checkbox"/> | ..... |
| Total                    | <input type="checkbox"/>                                                                                                                                                                                                | <input type="checkbox"/> | <input type="checkbox"/> | <input type="checkbox"/>                    | <input type="checkbox"/>     | <input type="checkbox"/> | <input type="checkbox"/> | <input type="checkbox"/> | <input type="checkbox"/>                             | <input type="checkbox"/> | ..... |

## Use of antibiotics

| <b>13</b>                | <i>Indicate (if any) what antibiotics were used to treat your pigs <u>over the last 90 days</u>. If no antibiotics have been used to treat disease, tick this box <input type="checkbox"/></i> |                                                                                                        |                                                                 |                                                  |  |
|--------------------------|------------------------------------------------------------------------------------------------------------------------------------------------------------------------------------------------|--------------------------------------------------------------------------------------------------------|-----------------------------------------------------------------|--------------------------------------------------|--|
| Product' commercial name | Pig type (tick)                                                                                                                                                                                | Administration method<br>(I=Injectable; W=Water;<br>F=Feed)                                            | Purpose                                                         | Date of last Administration (full date or month) |  |
|                          | So <input type="checkbox"/> Su <input type="checkbox"/> Gu <input type="checkbox"/><br>WG <input type="checkbox"/> F <input type="checkbox"/> B <input type="checkbox"/>                       | <input type="checkbox"/> Injectable<br><input type="checkbox"/> Water<br><input type="checkbox"/> Feed | <input type="checkbox"/> Treat <input type="checkbox"/> Prevent |                                                  |  |
|                          | So <input type="checkbox"/> Su <input type="checkbox"/> Gu <input type="checkbox"/><br>WG <input type="checkbox"/> F <input type="checkbox"/> B <input type="checkbox"/>                       | <input type="checkbox"/> Injectable<br><input type="checkbox"/> Water<br><input type="checkbox"/> Feed | <input type="checkbox"/> Treat <input type="checkbox"/> Prevent |                                                  |  |
|                          | So <input type="checkbox"/> Su <input type="checkbox"/> Gu <input type="checkbox"/><br>WG <input type="checkbox"/> F <input type="checkbox"/> B <input type="checkbox"/>                       | <input type="checkbox"/> Injectable<br><input type="checkbox"/> Water<br><input type="checkbox"/> Feed | <input type="checkbox"/> Treat <input type="checkbox"/> Prevent |                                                  |  |
|                          | So <input type="checkbox"/> Su <input type="checkbox"/> Gu <input type="checkbox"/><br>WG <input type="checkbox"/> F <input type="checkbox"/> B <input type="checkbox"/>                       | <input type="checkbox"/> Injectable<br><input type="checkbox"/> Water<br><input type="checkbox"/> Feed | <input type="checkbox"/> Treat <input type="checkbox"/> Prevent |                                                  |  |
|                          | So <input type="checkbox"/> Su <input type="checkbox"/> Gu <input type="checkbox"/><br>WG <input type="checkbox"/> F <input type="checkbox"/> B <input type="checkbox"/>                       | <input type="checkbox"/> Injectable<br><input type="checkbox"/> Water<br><input type="checkbox"/> Feed | <input type="checkbox"/> Treat <input type="checkbox"/> Prevent |                                                  |  |

S=Sows; Su=Sucklers; WG=Weaners, growers, fatteners; Gu=Guilt; B=Boars

## Vaccination

**14** Indicate (if any) which vaccines have been used your herd by pig type over the last year. If known. If no vaccines have been used in any of your pigs, tick this box

| Disease targeted            | Commercial name of the vaccine | Sow/s                    | Gilt/s                   | Boar/s                   | Weaners/Growers/fatteners | Sucklers                 |
|-----------------------------|--------------------------------|--------------------------|--------------------------|--------------------------|---------------------------|--------------------------|
| Classical swine fever       |                                | <input type="checkbox"/> | <input type="checkbox"/> | <input type="checkbox"/> | <input type="checkbox"/>  | <input type="checkbox"/> |
| Salmonella                  |                                | <input type="checkbox"/> | <input type="checkbox"/> | <input type="checkbox"/> | <input type="checkbox"/>  | <input type="checkbox"/> |
| FMD                         |                                | <input type="checkbox"/> | <input type="checkbox"/> | <input type="checkbox"/> | <input type="checkbox"/>  | <input type="checkbox"/> |
| Pasteurella                 |                                | <input type="checkbox"/> | <input type="checkbox"/> | <input type="checkbox"/> | <input type="checkbox"/>  | <input type="checkbox"/> |
| PRRS                        |                                | <input type="checkbox"/> | <input type="checkbox"/> | <input type="checkbox"/> | <input type="checkbox"/>  | <input type="checkbox"/> |
| Other:<br>specify<br>.....  |                                | <input type="checkbox"/> | <input type="checkbox"/> | <input type="checkbox"/> | <input type="checkbox"/>  | <input type="checkbox"/> |
| Other:<br>specify:<br>..... |                                | <input type="checkbox"/> | <input type="checkbox"/> | <input type="checkbox"/> | <input type="checkbox"/>  | <input type="checkbox"/> |

### Bio-security procedures and facilities

|                       |                                                                                                         |                                                                                                                  |
|-----------------------|---------------------------------------------------------------------------------------------------------|------------------------------------------------------------------------------------------------------------------|
| <b>15</b>             | <i>Describe the procedures /facilities that apply to the pig facilities and procedures in your farm</i> |                                                                                                                  |
| Bio-security          | Ante-room                                                                                               | <input type="checkbox"/> Yes; <input type="checkbox"/> No                                                        |
|                       | Change of boot/shoes                                                                                    | <input type="checkbox"/> Yes; <input type="checkbox"/> No                                                        |
|                       | Foot bath                                                                                               | <input type="checkbox"/> Yes; <input type="checkbox"/> No                                                        |
|                       | Separation of age groups                                                                                | <input type="checkbox"/> Yes; <input type="checkbox"/> No                                                        |
| Facilities            | Floor                                                                                                   | <input type="checkbox"/> Concrete; <input type="checkbox"/> Earth; <input type="checkbox"/> Other (specify)..... |
|                       | Metal slats in floors                                                                                   | <input type="checkbox"/> Yes; <input type="checkbox"/> No                                                        |
|                       | Farrowing crates                                                                                        | <input type="checkbox"/> Yes; <input type="checkbox"/> No                                                        |
|                       | Material of partitions                                                                                  | <input type="checkbox"/> Cement; <input type="checkbox"/> Wood; <input type="checkbox"/> Other (specify).....    |
| Disposal of dead pigs | Throw away                                                                                              | <input type="checkbox"/> Yes; <input type="checkbox"/> No                                                        |
|                       | Bury                                                                                                    | <input type="checkbox"/> Yes; <input type="checkbox"/> No                                                        |
|                       | Eat                                                                                                     | <input type="checkbox"/> Yes; <input type="checkbox"/> No                                                        |
|                       | Burn                                                                                                    | <input type="checkbox"/> Yes; <input type="checkbox"/> No                                                        |
|                       | Sell                                                                                                    | <input type="checkbox"/> Yes; <input type="checkbox"/> No                                                        |
|                       | Other                                                                                                   | Specify:.....                                                                                                    |

### Cleaning and disinfection procedures

| <b>16</b>                        | <i>Describe the C&amp;D procedures in the houses/pens where pigs are kept of your farm practised over the last 6 months by ticking the appropriate box and describe frequency (number of times per month)</i> |                                          |                                          |                                   |                            |
|----------------------------------|---------------------------------------------------------------------------------------------------------------------------------------------------------------------------------------------------------------|------------------------------------------|------------------------------------------|-----------------------------------|----------------------------|
| Pig type                         | Not washed or disinfected pens/houses                                                                                                                                                                         | Washed (with water only)                 | Washed with disinfectant                 | Commercial name of disinfectant/s | Dilution rate (e.g. 1:100) |
| Sow/s                            | <input type="checkbox"/>                                                                                                                                                                                      | <input type="checkbox"/> Frequency:..... | <input type="checkbox"/> Frequency:..... |                                   |                            |
| Suckler/s                        | <input type="checkbox"/>                                                                                                                                                                                      | <input type="checkbox"/> Frequency:..... | <input type="checkbox"/> Frequency:..... |                                   |                            |
| Gilt/s                           | <input type="checkbox"/>                                                                                                                                                                                      | <input type="checkbox"/> Frequency:..... | <input type="checkbox"/> Frequency:..... |                                   |                            |
| Weaner/<br>Grower/F<br>attener/s | <input type="checkbox"/>                                                                                                                                                                                      | <input type="checkbox"/> Frequency:..... | <input type="checkbox"/> Frequency:..... |                                   |                            |
| Boar/s                           | <input type="checkbox"/>                                                                                                                                                                                      | <input type="checkbox"/> Frequency:..... | <input type="checkbox"/> Frequency:..... |                                   |                            |

**Rodents and wild birds**

|            |                                                                                                                                                                                     |  |
|------------|-------------------------------------------------------------------------------------------------------------------------------------------------------------------------------------|--|
| <b>17</b>  | <i>Describe the frequency of sightings of live rodents and wild birds in your farm.</i>                                                                                             |  |
| Rodents    | <input type="checkbox"/> Never<br><input type="checkbox"/> Less than once a month<br><input type="checkbox"/> 1-4 times per month)<br><input type="checkbox"/> > 4 times per month) |  |
| Wild birds | <input type="checkbox"/> Never<br><input type="checkbox"/> Less than once a month<br><input type="checkbox"/> 1-4 times per month)<br><input type="checkbox"/> > 4 times per month) |  |

**Feed/water sources**

|           |                                          |                                        |                                              |                                     |                                |
|-----------|------------------------------------------|----------------------------------------|----------------------------------------------|-------------------------------------|--------------------------------|
| <b>18</b> | <i>Describe the feed/water sources</i>   |                                        |                                              |                                     |                                |
| Feed      | <input type="checkbox"/> Commercial feed | <input type="checkbox"/> Home mix      | <input type="checkbox"/> Household leftovers | <input type="checkbox"/> Others     |                                |
| Water     | <input type="checkbox"/> Municipal water | <input type="checkbox"/> Raining water | <input type="checkbox"/> River water         | <input type="checkbox"/> Well water | <input type="checkbox"/> Other |

**THANKS VERY MUCH!**

**POULTRY FARM QUESTIONNAIRE – Baseline study - Dong Thap**

Date of interview: ...../...../.....

Farm ID: .....

Interviewer: .....

Verified by: .....

**General information**

|   |                                                                       |  |                            |  |          |         |
|---|-----------------------------------------------------------------------|--|----------------------------|--|----------|---------|
| 1 | <i>Name of interviewee</i> (Print in block letters)<br>.....          |  | <i>Telephone:</i><br>..... |  |          |         |
|   | Gender: <input type="checkbox"/> Male <input type="checkbox"/> Female |  | Age (in years): .....      |  |          |         |
| 3 | <i>Address of farm</i>                                                |  |                            |  |          |         |
| 4 | <i>Village</i> (Print in block letters)                               |  |                            |  |          |         |
| 5 | <i>Commune</i> (Print in block letters)                               |  |                            |  |          |         |
| 6 | <i>District</i> (Print in block letters)                              |  |                            |  |          |         |
| 7 | <i>Province</i> (Print in block letters)                              |  |                            |  |          |         |
| 8 | <i>Indicate total surface dedicated to poultry housing (sq. m)</i>    |  |                            |  |          |         |
| 9 | <i>Coordinates</i> (GPS) (if known)                                   |  | Degrees <sup>o</sup>       |  | Minutes' |         |
|   |                                                                       |  | Northing                   |  | ---      | ---.--- |
|   |                                                                       |  | Easting                    |  | ---      | ---.--- |

## Poultry

10

Please list all poultry flocks currently kept in your farm

| Flock No. | Poultry species (see keys) | Number | Age (in weeks)<br>[Indicate range if multi-age] | Purpose                                                                                                                                | Are birds kept in their pen/house 24h/day? (Y/N) |                          |
|-----------|----------------------------|--------|-------------------------------------------------|----------------------------------------------------------------------------------------------------------------------------------------|--------------------------------------------------|--------------------------|
|           |                            |        |                                                 |                                                                                                                                        | Yes                                              | No                       |
|           |                            |        |                                                 | <input type="checkbox"/> Egg <input type="checkbox"/> Breeding<br><input type="checkbox"/> Meat <input type="checkbox"/> Multi-purpose | <input type="checkbox"/>                         | <input type="checkbox"/> |
|           |                            |        |                                                 | <input type="checkbox"/> Egg <input type="checkbox"/> Breeding<br><input type="checkbox"/> Meat <input type="checkbox"/> Multi-purpose | <input type="checkbox"/>                         | <input type="checkbox"/> |
|           |                            |        |                                                 | <input type="checkbox"/> Egg <input type="checkbox"/> Breeding<br><input type="checkbox"/> Meat <input type="checkbox"/> Multi-purpose | <input type="checkbox"/>                         | <input type="checkbox"/> |
|           |                            |        |                                                 | <input type="checkbox"/> Egg <input type="checkbox"/> Breeding<br><input type="checkbox"/> Meat <input type="checkbox"/> Multi-purpose | <input type="checkbox"/>                         | <input type="checkbox"/> |
|           |                            |        |                                                 | <input type="checkbox"/> Egg <input type="checkbox"/> Breeding<br><input type="checkbox"/> Meat <input type="checkbox"/> Multi-purpose | <input type="checkbox"/>                         | <input type="checkbox"/> |
|           |                            |        |                                                 | <input type="checkbox"/> Egg <input type="checkbox"/> Breeding<br><input type="checkbox"/> Meat <input type="checkbox"/> Multi-purpose | <input type="checkbox"/>                         | <input type="checkbox"/> |
|           |                            |        |                                                 | <input type="checkbox"/> Egg <input type="checkbox"/> Breeding<br><input type="checkbox"/> Meat <input type="checkbox"/> Multi-purpose | <input type="checkbox"/>                         | <input type="checkbox"/> |

C=Chickens; D=Ducks; M=Muscovies; Q=Quails; G=Geese





## Use of antibiotics

13

Indicate (if any) what antibiotics were used to treat your poultry over the last 90 days. If no antibiotics have been used to treat disease, tick this box

| Product' commercial name | Flock Number (see Table 10) | Administration method (W=Water; F=Feed; I=Injectable)                                                  | Purpose                                                         | Date of last Administration (full date or month) |
|--------------------------|-----------------------------|--------------------------------------------------------------------------------------------------------|-----------------------------------------------------------------|--------------------------------------------------|
|                          |                             | <input type="checkbox"/> Injectable<br><input type="checkbox"/> Water<br><input type="checkbox"/> Feed | <input type="checkbox"/> Treat <input type="checkbox"/> Prevent |                                                  |
|                          |                             | <input type="checkbox"/> Injectable<br><input type="checkbox"/> Water<br><input type="checkbox"/> Feed | <input type="checkbox"/> Treat <input type="checkbox"/> Prevent |                                                  |
|                          |                             | <input type="checkbox"/> Injectable<br><input type="checkbox"/> Water<br><input type="checkbox"/> Feed | <input type="checkbox"/> Treat <input type="checkbox"/> Prevent |                                                  |
|                          |                             | <input type="checkbox"/> Injectable<br><input type="checkbox"/> Water<br><input type="checkbox"/> Feed | <input type="checkbox"/> Treat <input type="checkbox"/> Prevent |                                                  |
|                          |                             | <input type="checkbox"/> Injectable<br><input type="checkbox"/> Water<br><input type="checkbox"/> Feed | <input type="checkbox"/> Treat <input type="checkbox"/> Prevent |                                                  |

## Vaccination

**14** Indicate (if any) any vaccines you have used for your flocks over the last year. If known. If no vaccines have been used in any of your flocks, tick this box

| Disease targeted                  | Commercial name of the vaccine | Meat chickens            | Layer chickens           | Meat ducks               | Layer ducks              | Other:.....              |
|-----------------------------------|--------------------------------|--------------------------|--------------------------|--------------------------|--------------------------|--------------------------|
| Highly pathogenic avian influenza |                                | <input type="checkbox"/> |
| Newcastle disease                 |                                | <input type="checkbox"/> |
| Duck plague                       |                                | <input type="checkbox"/> |
| Gumboro                           |                                | <input type="checkbox"/> |
| Infectious bronchitis             |                                | <input type="checkbox"/> |
| Infectious laryngotracheitis      |                                | <input type="checkbox"/> |
| Marek's disease                   |                                | <input type="checkbox"/> |
| Salmonella                        |                                | <input type="checkbox"/> |
| Mycoplasma                        |                                | <input type="checkbox"/> |
| Other                             |                                | <input type="checkbox"/> |

### Bio-security procedures and facilities

|                          |                                                                                                                                      |                                                           |
|--------------------------|--------------------------------------------------------------------------------------------------------------------------------------|-----------------------------------------------------------|
| <b>15</b>                | <i>Describe the procedures /facilities that apply to the poultry facilities and disposal procedures of dead poultry in your farm</i> |                                                           |
| Bio-security             | Ante-room                                                                                                                            | <input type="checkbox"/> Yes; <input type="checkbox"/> No |
|                          | Change of boot/shoes                                                                                                                 | <input type="checkbox"/> Yes; <input type="checkbox"/> No |
|                          | Foot bath                                                                                                                            | <input type="checkbox"/> Yes; <input type="checkbox"/> No |
|                          | Separation of age groups                                                                                                             | <input type="checkbox"/> Yes; <input type="checkbox"/> No |
| Disposal of dead poultry | Throw away                                                                                                                           | <input type="checkbox"/> Yes; <input type="checkbox"/> No |
|                          | Bury                                                                                                                                 | <input type="checkbox"/> Yes; <input type="checkbox"/> No |
|                          | Eat                                                                                                                                  | <input type="checkbox"/> Yes; <input type="checkbox"/> No |
|                          | Burn                                                                                                                                 | <input type="checkbox"/> Yes; <input type="checkbox"/> No |
|                          | Sell                                                                                                                                 | <input type="checkbox"/> Yes; <input type="checkbox"/> No |
|                          | Other                                                                                                                                | Specify:.....                                             |

### Cleaning and disinfection procedures

| <b>16</b>                   | <i>Describe the C&amp;D procedures in the houses/pens where poultry are kept of your farm practised over the last 6 months by ticking the appropriate box and describe frequency (number of times per month)</i> |                                          |                                          |                                   |                            |
|-----------------------------|------------------------------------------------------------------------------------------------------------------------------------------------------------------------------------------------------------------|------------------------------------------|------------------------------------------|-----------------------------------|----------------------------|
| Flock Number (see Table 10) | Not washed or disinfected house/pen                                                                                                                                                                              | Washed (water only)                      | Washed with disinfectant                 | Commercial name of disinfectant/s | Dilution rate (e.g. 1:100) |
|                             | <input type="checkbox"/>                                                                                                                                                                                         | <input type="checkbox"/> Frequency:..... | <input type="checkbox"/> Frequency:..... |                                   |                            |
|                             | <input type="checkbox"/>                                                                                                                                                                                         | <input type="checkbox"/> Frequency:..... | <input type="checkbox"/> Frequency:..... |                                   |                            |
|                             | <input type="checkbox"/>                                                                                                                                                                                         | <input type="checkbox"/> Frequency:..... | <input type="checkbox"/> Frequency:..... |                                   |                            |
|                             | <input type="checkbox"/>                                                                                                                                                                                         | <input type="checkbox"/> Frequency:..... | <input type="checkbox"/> Frequency:..... |                                   |                            |
|                             | <input type="checkbox"/>                                                                                                                                                                                         | <input type="checkbox"/> Frequency:..... | <input type="checkbox"/> Frequency:..... |                                   |                            |

**Rodents and wild birds**

|            |                                                                                                                                                                                     |  |
|------------|-------------------------------------------------------------------------------------------------------------------------------------------------------------------------------------|--|
| <b>17</b>  | <i>Describe the frequency of sightings of live rodents and wild birds in your farm.</i>                                                                                             |  |
| Rodents    | <input type="checkbox"/> Never<br><input type="checkbox"/> Less than once a month<br><input type="checkbox"/> 1-4 times per month)<br><input type="checkbox"/> > 4 times per month) |  |
| Wild birds | <input type="checkbox"/> Never<br><input type="checkbox"/> Less than once a month<br><input type="checkbox"/> 1-4 times per month)<br><input type="checkbox"/> > 4 times per month) |  |

**Feed/water sources**

|           |                                                                       |                                        |                                              |                                     |                                |
|-----------|-----------------------------------------------------------------------|----------------------------------------|----------------------------------------------|-------------------------------------|--------------------------------|
| <b>18</b> | <i>Describe the feed/water sources and the disposal of dead birds</i> |                                        |                                              |                                     |                                |
| Feed      | <input type="checkbox"/> Commercial feed                              | <input type="checkbox"/> Home mix      | <input type="checkbox"/> Household leftovers | <input type="checkbox"/> Others     |                                |
| Water     | <input type="checkbox"/> Municipal water                              | <input type="checkbox"/> Raining water | <input type="checkbox"/> River water         | <input type="checkbox"/> Well water | <input type="checkbox"/> Other |

**THANKS VERY MUCH!**
